# Supplementary material for: Fluorescence imaging of a new monofunctional platinum(ii) complex containing a thioflavin-T (ThT)-based fluorophore
Source: Royal Society of Chemistry journal article supplement (doi:10.1039/c5nj00107b), 2015-01-01
Supplement: c5nj00107b1.pdf [file c5nj00107b1.pdf]

## Supplementary Material

# Fluorescent imaging of a new monofunctional platinum(II) complex containing a thioflavin-T (ThT)-based fluorophore

Zhanfen Chen,\* Shuping Zhang, Lei Shen, Zhenzhu Zhu, Jian Zhang

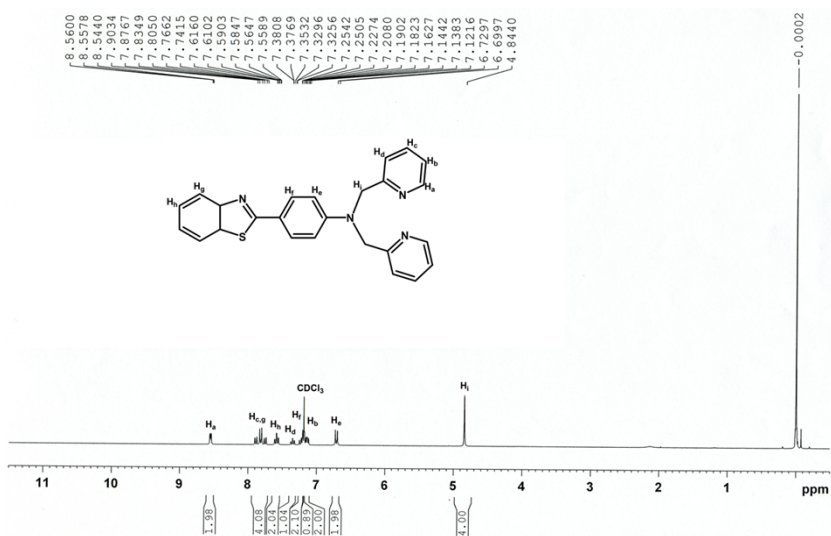

Fig. S1 <sup>1</sup>H NMR spectrum of Ligand L in CDCl<sub>3</sub>.

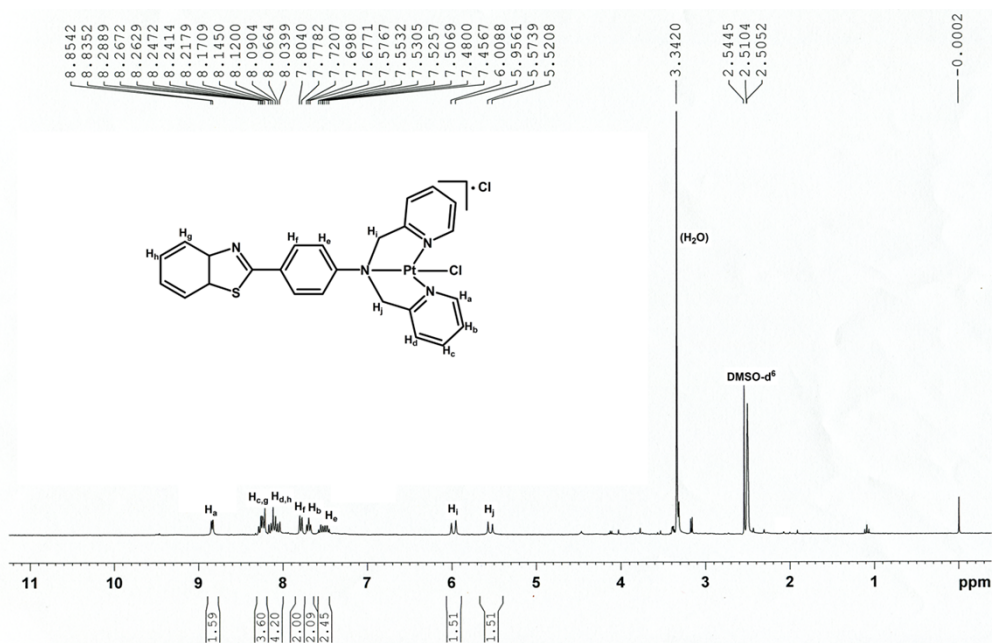

\* Corresponding author. Tel: +86 714 6515602; fax: +86 714 6515602.  
E-mail addresses: chenxf1979@163.com (Z.F. Chen).

**Fig. S2**  $^1\text{H}$  NMR spectrum of  $[\text{PtLCl}]\text{Cl}$  in  $\text{DMSO-d}^6$ .

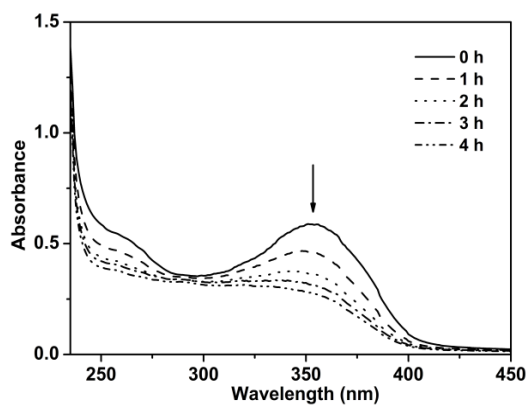

**Fig. S3** Time-dependent absorption spectra of  $[\text{PtLCl}]\text{Cl}$  ( $3 \times 10^{-5}$  M) in the presence of a fixed amount of CT-DNA ( $r = [\text{DNA}]/[\text{complex}] = 0.5$ ) at room temperature in pH 7.40.

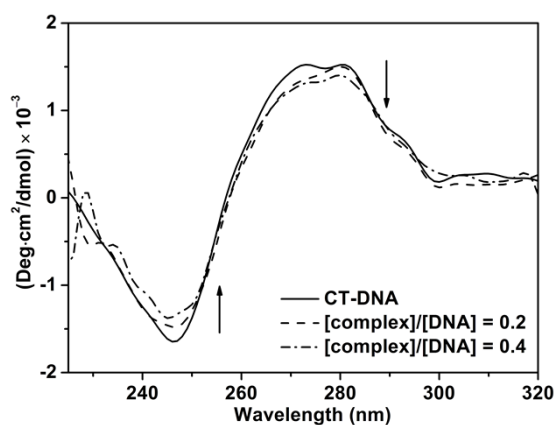

**Fig. S4** Circular dichroism (CD) spectra of CT-DNA ( $1.7 \times 10^{-4}$  M) in the absence (solid line) and presence of  $[\text{PtLCl}]\text{Cl}$  at concentration ratios of  $[\text{PtLCl}]\text{Cl}$  to DNA of 0.2 and 0.4 (dashed line and dash-dotted line, respectively).

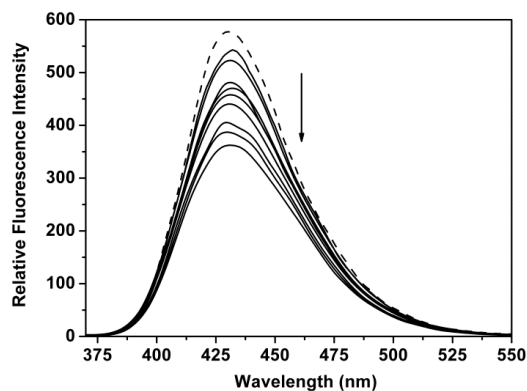

**Fig. S5** Fluorescence emission spectra ( $\lambda_{\text{ex}} = 360 \text{ nm}$ ) of  $[\text{PtLCl}]\text{Cl}$  ( $3 \times 10^{-5} \text{ M}$ ) in the absence (dashed line) and presence (solid line) of increasing amount of CT-DNA ( $r = [\text{DNA}]/[\text{complex}] = 0, 0.1, 0.2, 0.3, 0.4, 0.5, 0.6, 0.7, 0.8, 0.9$ ) at room temperature in Tris-HCl/NaCl buffer (pH 7.40).

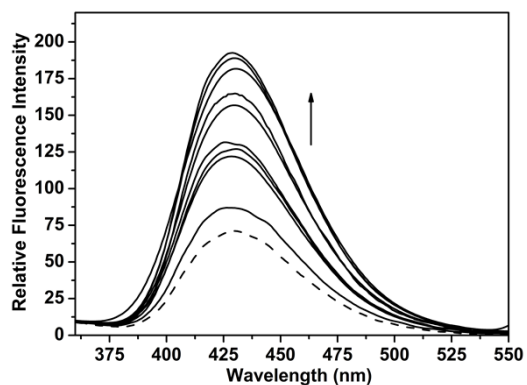

**Fig. S6** Fluorescence emission spectra ( $\lambda_{\text{ex}} = 360 \text{ nm}$ ) of **L** ( $3 \times 10^{-5} \text{ M}$ ) in the absence (dashed line) and presence (solid line) of increasing amount of CT-DNA ( $r = [\text{DNA}]/[\text{complex}] = 0, 0.1, 0.2, 0.3, 0.4, 0.5, 0.6, 0.7, 0.8, 0.9$ ) at room temperature in Tris-HCl/NaCl buffer (pH 7.40).

**Table S1** Cytotoxicity of [PtLCl]Cl and **L** towards different tumour cell lines after incubation for 48 h, with cisplatin as the reference

| Tested compound | IC <sub>50</sub> (μM) <sup>a</sup> |       |       |
|-----------------|------------------------------------|-------|-------|
|                 | HeLa                               | A549  | MCF-7 |
| Cisplatin       | 17.68                              | 8.62  | 21.18 |
| [PtLCl]Cl       | 87.26                              | 34.54 | 69.51 |
| <b>L</b>        | – <sup>b</sup>                     | –     | –     |

<sup>a</sup> Compound concentration required to inhibit cell proliferation by 50%.

<sup>b</sup> Undetectable.
